# Supplementary material
Source: Springer Nature journal article supplement (https://www.springermedizin.de/resource/supplementary/12884_2013_1250_MOESM3_ESM.docx/9459186)
Supplement: MOESM3 [file 9459186]

**Table 3** Results of bivariate and multivariate logistic regression analysis on maternal-child services and neonatal care practice factors of neonatal mortality among low birth weight

| **Variables** | **Case**  **n=250(%)** | **Control n=250(%)** | **Crude OR**  **95 % CI** | **p-value** | **Adjusted OR**  **95 % CI** | **p-value** |
| --- | --- | --- | --- | --- | --- | --- |
| **Maternal-child health services** | | | | | | |
| **Referral**  Appropriate  Inappropriate | 155 (62.0)  95(38.0) | 101 (40.4)  149 (59.6) | 1  0.86  (0.69-1.23) | 0.67 | 1  0.93  (0.02-5.92) | 0.77 |
| **Neonatal visit**  Appropriate  Inappropriate | 198(79.2)  52(20.8) | 239(95.6)  11(4.4) | 1  10.15  (5.47-18.84) | <0.01 | 1  7.04  (3.67-13.49) | <0.01 |
| **Neonatal care practice** | | | | | | |
| **Time of first bath**  Immediately  Delay (≥12hours) | 16(6.4)  234(93.6) | 5(2.0)  245(98.0) | 3.35  (1.21-9.29)  1 | 0.02 | 2.03  (0.24-16.96)  1 | 0.51 |
| **Bath twice a day**  No  Yes | 246(98.4)  4(1.6) | 237(94.8)  13(5.2) | 1  0.30  (0.09-0.92) | 0.04 | 1  1.55  (0.23-10.45) | 0.65 |
| **Kangaroo mother care (KMC)**  Not practice  Practice | 248(99.2)  2(0.8) | 206(82.4)  44(17.6) | 26.49  (6.35-110.57)  1 | <0.01 | 15.32  (2.85-82.56)  1 | 0.01 |
| **Use warm bottle pack**  Not practice  Practice | 241(96.4)  9(3.6) | 140(56.0)  110(44.0) | 21.04  (10.34-2.83)  1 | <0.01 | 20.70  (6.32-67.80)  1 | <0.01 |
| **Use lamp bulb**  Not practice  Practice | 241(96.4)  9(3.6) | 211(84.4)  39(15.6) | 3.33  (0.97-11.42)  1 | 0.06 | 0.42  (0.10-1.70)  1 | 0.23 |
| **Use ‘*didaring*’**  Not practice  Practice | 225(90.0)  25(10.0) | 147(58.8)  103(41.2) | 3.32  (2.00-5.50)  1 | <0.01 | 4.33  (1.83-10.19)  1 | <0.01 |
| **Umbilical cord care**  Appropriate  Inappropriate | 230(92.0)  20(8.0) | 228(91.2)  22(8.8) | 1  0.99 | 1.00 | 1  0.99 | 1.00 |
| **Hand wash before touch baby**  No  Yes | 247(98.8)  3(1.2) | 238(95.2)  12(4.8) | 4.51  (1.16-14.89)  1 | 0.06 | 6.62  (0.16-28.41)  1 | 0.32 |
| **Initiation of breastfeeding**  Late (>1 hour)  Early | 219(87.6)  31(12.4) | 131(52.4)  119(47.6) | 6.42  (4.09-10.07)  1 | <0.01 | 2.03  (1.09-3.80)  1 | 0.03 |
| **Discard colostrums**  No  Yes | 119(47.6)  131(52.4) | 224(89.6)  26(10.4) | 1  9.48  (5.89-15.27) | <0.01 | 1  3.53  (1.93-6.43) | <0.01 |
| **Exclusive breastfeeding(n=462)**  No  Yes | 195(92.0)  17(8.0) | 117(46.8)  133(53.2) | 13.0  (7.8-22.0)  1 | <0.01 | 5.58  (2.89-10.77)  1 | <0.01 |

Note: f= frequency; CI= confidence interval; OR= odd ratio. Adjusted OR (aOR) were adjusted with all variables used in this study. Enter method was used referring to the method in SPSS in multiple regression of entering all variables together regardless of significance levels.
